# Supplementary material for: Current state of biogas and biomethane production and its implications for Spain
Source: Royal Society of Chemistry journal article supplement (doi:10.1039/d3se00419h), 2023-01-01
Supplement: d3se00419h1.pdf [file d3se00419h1.pdf]

There is no supplementary information available for this article
